# Supplementary material for: Acyl ethanolamides in Diabetes and Diabetic Nephropathy: Novel targets from untargeted plasma metabolomic profiles of South Asian Indian men
Source: PubMed Central journal article supplement (PMC6889195; doi:10.1038/s41598-019-54584-2), 2019-12-02

## Supplementary Information

**Manuscript title: Acyl ethanolamides in Diabetes and Diabetic Nephropathy: Novel targets from untargeted plasma metabolomic profiles of South Asian Indian men**

Sarita Devi<sup>1,#</sup>, Bajanai Nongkhaw<sup>1,#</sup>, Limesh M<sup>2</sup>, Roshni M. Pasanna<sup>1</sup>, Tinku Thomas<sup>3</sup>, Rebecca Kuriyan<sup>1</sup>, Anura V. Kurpad<sup>1,+</sup> and Arpita Mukhopadhyay<sup>1,+,\*</sup>

<sup>1</sup>Division of Nutrition, St John's Research Institute, St John's National Academy of Health Sciences, Bangalore, India;

<sup>2</sup>Department of Nephrology, St John's Medical College and Hospital, St. John's National Academy of Health Sciences, Bangalore, India;

<sup>3</sup>Department of Biostatistics, St John's Medical College and Hospital, St. John's Research Institute, St. John's National Academy of Health Sciences, Bangalore, India.

#Joint first authors

+Joint senior authors

*\*Corresponding author:*

Division of Nutrition

Division of Nutrition, St. John's Research Institute, St. John's National Academy of Health Sciences, Sarjapur Road, Bangalore, India. PIN: 560034

Phone: +91-80-49467000

Fax: +91-80-25501088

Email address: arpitam@sjri.res.in

**Supplementary Table 1:** The 16 metabolites significantly dysregulated between NGT and T2D, T2D and T2D-DN as well as NGT and T2D-DN (FDR adjusted *p*-value <0.05)]. (NGT: normal glucose tolerance, T2D: type 2 diabetes mellitus, T2D-DN: type 2 diabetes mellitus-diabetic nephropathy)

| Metabolite                            | Ratio T2D/NGT | Ratio T2D-DN/NGT | Ratio T2D-DN/T2D | Adjusted <i>p</i> -value T2D/NGT | Adjusted <i>p</i> -value T2D-DN/NGT | Adjusted <i>p</i> -value T2D-DN/T2D |
|---------------------------------------|---------------|------------------|------------------|----------------------------------|-------------------------------------|-------------------------------------|
| (betaS)-beta-Hydroxy-L-tryptophan     | 3.4           | 4.9              | 1.4              | 0.013                            | <0.001                              | 0.011                               |
| (R)-3-hydroxybutyrylcarnitine         | 1.5           | 2.0              | 1.3              | 0.001                            | <0.001                              | 0.008                               |
| 2-Amino-9,10-epoxy-8-oxodecanoic acid | 1.4           | 1.9              | 1.3              | 0.015                            | <0.001                              | 0.046                               |
| 6-Oxo-2-piperidinecarboxylic acid     | 1.5           | 2.3              | 1.5              | 0.001                            | <0.001                              | <0.001                              |
| Anagestone Acetate                    | 1.4           | 2.1              | 1.5              | 0.029                            | <0.001                              | 0.005                               |
| Apronalide                            | 1.4           | 2.8              | 2.0              | 0.032                            | <0.001                              | <0.001                              |
| Cholecalciferol                       | 0.7           | 0.5              | 0.8              | 0.006                            | <0.001                              | 0.043                               |
| Diosgenin                             | 0.8           | 0.6              | 0.7              | 0.028                            | <0.001                              | 0.022                               |
| DL-Dipalmitoylphosphatidylcholine     | 1.5           | 2.6              | 1.7              | 0.029                            | <0.001                              | 0.002                               |
| Imidazolelactate                      | 1.6           | 3.2              | 2.0              | 0.001                            | <0.001                              | <0.001                              |
| Lauramide                             | 0.8           | 0.7              | 0.8              | 0.023                            | <0.001                              | 0.031                               |
| N-Acetylorithine                      | 1.4           | 2.5              | 1.8              | 0.021                            | <0.001                              | <0.001                              |
| Primobolan                            | 0.7           | 0.6              | 0.8              | 0.048                            | <0.001                              | 0.010                               |
| Tetrahydrocorticosterone              | 1.4           | 3.3              | 2.3              | 0.041                            | <0.001                              | <0.001                              |
| Trigonelline                          | 1.4           | 2.4              | 1.7              | 0.035                            | <0.001                              | 0.002                               |
| Xanthoaphin                           | 0.5           | 0.1              | 0.3              | 0.017                            | <0.001                              | <0.001                              |

**Supplementary Table 2.** The 48 metabolites significantly associated with T2D irrespective of renal function of the subjects [significantly dysregulated (FDR adjusted *p*-value < 0.05) between NGT and T2D and between NGT and T2D-DN but not between T2D and T2D-DN]. (NGT: normal glucose tolerance, T2D: type 2 diabetes mellitus, T2D-DN: type 2 diabetes mellitus-diabetic nephropathy)

| Metabolite                                                            | Ratio T2D/N GT | Ratio T2D-DN/N GT | Ratio T2D-DN/T 2D | Adjusted <i>p</i> -value T2D/N GT | Adjusted <i>p</i> -value T2D-DN/N GT | Adjusted <i>p</i> -value T2D-DN/T 2D |
|-----------------------------------------------------------------------|----------------|-------------------|-------------------|-----------------------------------|--------------------------------------|--------------------------------------|
| (2E,4E,14E)-13-Hydroperoxy-N-(2-methylpropyl)icosa-2,4,14-trienamide  | 0.5            | 0.5               | 1.1               | 0.023                             | 0.013                                | 1.000                                |
| 18-hydroxy-5Z,8Z,11Z,14Z-eicosatetraenoic acid                        | 0.8            | 0.7               | 0.9               | 0.018                             | <0.001                               | 1.000                                |
| 1-Linoleoyl glycerol                                                  | 1.6            | 1.6               | 1.0               | 0.001                             | <0.001                               | 1.000                                |
| 1-Stearoylglycerol                                                    | 1.7            | 1.9               | 1.1               | <0.001                            | <0.001                               | 0.923                                |
| 2-Linoleoyl glycerol                                                  | 1.7            | 1.7               | 1.0               | 0.007                             | <0.001                               | 1.000                                |
| Cytidine 5'-diphosphocholine                                          | 1.0            | 1.0               | 1.0               | 0.045                             | 0.009                                | 1.000                                |
| D-Raffinose                                                           | 1.6            | 1.6               | 1.0               | <0.001                            | <0.001                               | 1.000                                |
| Fingolimod                                                            | 0.5            | 0.2               | 0.4               | 0.035                             | <0.001                               | 0.285                                |
| Jasmonic acid                                                         | 0.9            | 1.0               | 1.0               | 0.002                             | 0.001                                | 1.000                                |
| Palmitoyl sphingomyelin                                               | 1.4            | 1.7               | 1.2               | 0.035                             | <0.001                               | 0.754                                |
| Sorbitane trioleate                                                   | 0.5            | 0.5               | 0.9               | <0.001                            | <0.001                               | 0.420                                |
| Taurocholic acid                                                      | 0.3            | 0.2               | 0.7               | 0.042                             | 0.001                                | 1.000                                |
| Cassine                                                               | 0.6            | 0.6               | 0.9               | <0.001                            | <0.001                               | 0.938                                |
| 17 $\alpha$ -Methyl-androstan-3-hydroxyimine-17 $\beta$ -ol           | 0.3            | 0.3               | 0.8               | <0.001                            | <0.001                               | 0.188                                |
| 1-hexadecanoyl-2-(9Z,12Z-octadecadienoyl)-sn-glycero-3-phosphocholine | 2.4            | 2.3               | 1.0               | <0.001                            | <0.001                               | 1.000                                |
| 2,3-bis-O-(geranylgeranyl)-sn-glycero-3-phospho-L-serine              | 1.4            | 1.3               | 0.9               | 0.004                             | 0.001                                | 1.000                                |
| 2-[(5Z)-5-Tetradecen-1-yl]cyclobutanone                               | 0.4            | 0.2               | 0.5               | 0.031                             | <0.001                               | 0.134                                |
| 3-dehydrosphingosine                                                  | 0.4            | 0.3               | 0.9               | <0.001                            | <0.001                               | 0.577                                |
| 3-Oxalomalic acid                                                     | 0.9            | 0.8               | 0.9               | 0.008                             | <0.001                               | 1.000                                |
| Diphenyl sulfoxide                                                    | 1.6            | 1.4               | 0.9               | <0.001                            | 0.002                                | 0.310                                |
| Linoleamide                                                           | 0.7            | 0.6               | 0.9               | <0.001                            | <0.001                               | 0.467                                |
| 9,10,18-Trihydroxystearic Acid                                        | 0.7            | 0.7               | 0.9               | 0.001                             | <0.001                               | 0.800                                |
| Lumichrome                                                            | 2.3            | 1.7               | 0.7               | 0.028                             | 0.026                                | 1.000                                |
| Acetylcholine                                                         | 0.7            | 0.8               | 1.1               | <0.001                            | <0.001                               | 0.599                                |
| Acetyl-L-leucyl-L-leucylargininal                                     | 1.0            | 0.9               | 1.0               | 0.011                             | 0.001                                | 1.000                                |
| Azelnidipine                                                          | 0.6            | 0.5               | 0.9               | 0.013                             | 0.001                                | 1.000                                |
| Bardoxolone methyl                                                    | 1.4            | 1.4               | 1.0               | 0.033                             | 0.001                                | 1.000                                |
| 2-Octenoic acid                                                       | 0.7            | 0.6               | 0.8               | 0.027                             | <0.001                               | 1.000                                |

|                                         |       |     |     |        |        |       |
|-----------------------------------------|-------|-----|-----|--------|--------|-------|
| 4-Oxoretinoic acid                      | 0.6   | 0.4 | 0.7 | 0.001  | <0.001 | 0.220 |
| Cortisol                                | 1.4   | 1.3 | 0.9 | 0.017  | 0.022  | 1.000 |
| Drofenine                               | 0.4   | 0.2 | 0.6 | <0.001 | <0.001 | 0.192 |
| Epicillin                               | 1.2   | 1.2 | 1.0 | 0.017  | <0.001 | 1.000 |
| Epitestosterone                         | 0.7   | 0.8 | 1.1 | 0.011  | 0.018  | 0.969 |
| Gamma-Glutamyl-S-allylcysteine          | 0.7   | 0.5 | 0.7 | 0.049  | <0.001 | 0.160 |
| Glimepiride                             | 1.2   | 1.2 | 1.0 | 0.006  | <0.001 | 1.000 |
| Glycerophospho-N-palmitoyl ethanolamine | 1.2   | 1.3 | 1.0 | 0.045  | 0.002  | 1.000 |
| Hexadecanamide                          | 0.6   | 0.4 | 0.7 | 0.001  | <0.001 | 0.143 |
| MDMA Methylene homolog                  | 2.1   | 2.6 | 1.2 | 0.038  | 0.001  | 1.000 |
| Metformin                               | 835.4 | 1.5 | 0.0 | <0.001 | <0.001 | 0.098 |
| N-benzoyl-D-arginine-4-nitroanilide     | 0.5   | 0.7 | 1.2 | 0.001  | <0.001 | 1.000 |
| Oleamide                                | 0.5   | 0.4 | 0.8 | 0.022  | <0.001 | 0.848 |
| Palmitoleoyl ethanolamide               | 0.4   | 0.4 | 0.8 | <0.001 | <0.001 | 0.523 |
| PC(18:3(9Z,12Z,15Z)/18:2(9Z,12Z))       | 2.2   | 1.7 | 0.8 | <0.001 | <0.001 | 0.686 |
| Stearamide                              | 0.6   | 0.4 | 0.7 | 0.006  | <0.001 | 0.068 |
| Tretinoin                               | 0.4   | 0.5 | 1.1 | 0.003  | <0.001 | 1.000 |
| Yersiniabactin                          | 4.3   | 3.0 | 0.7 | <0.001 | <0.001 | 0.761 |
| Sphinganine                             | 0.8   | 0.7 | 0.9 | 0.041  | <0.001 | 0.699 |
| $\gamma$ -Linolenic acid ethyl ester    | 1.2   | 1.3 | 1.0 | 0.013  | 0.001  | 1.000 |

**Supplementary Table 3.** The 192 metabolites specifically associated with T2D-DN [significantly dysregulated between NGT and T2D-DN as well as between T2D and T2D-DN (FDR adjusted  $p$ -value < 0.05) but not between NGT and T2D; and exhibiting a difference of  $\geq 2$  folds or  $\leq 0.5$  fold between the T2D-DN and T2D groups]. (NGT: normal glucose tolerance, T2D: type 2 diabetes mellitus, T2D-DN: type 2 diabetes mellitus-diabetic nephropathy)

| Metabolite                                                                                             | Ratio T2D/N GT | Ratio T2D-DN/N GT | Ratio T2D-DN/T 2D | Adjusted $p$ -value T2D/N GT | Adjusted $p$ -value T2D-DN/N GT | Adjusted $p$ -value T2D-DN/T 2D |
|--------------------------------------------------------------------------------------------------------|----------------|-------------------|-------------------|------------------------------|---------------------------------|---------------------------------|
| 12,13-dihydroxy-9Z-octadecenoic acid                                                                   | 1.2            | 4.9               | 4.2               | 1.000                        | <0.001                          | <0.001                          |
| Pantetheine                                                                                            | 0.7            | 3.7               | 5.4               | 1.000                        | <0.001                          | <0.001                          |
| (2R,3S)-3-Hydroxy-8-methyl-8-azabicyclo[3.2.1]octane-2-carboxylic acid                                 | 1.1            | 2.4               | 2.1               | 1.000                        | <0.001                          | 0.001                           |
| (8aR,12S,12aR)-12-Hydroxy-4-methyl-4,5,6,7,8,8a,12,12a-octahydro-2H-3-benzoxecine-2,9(1H)-dione        | 1.1            | 7.8               | 6.8               | 0.857                        | <0.001                          | <0.001                          |
| 1-(2,4,5-Trimethoxyphenyl)-1,2-propanedione                                                            | 1.0            | 2.4               | 2.3               | 1.000                        | <0.001                          | 0.022                           |
| 1-(2,4-Dihydroxyphenyl)-1-butanone                                                                     | 1.0            | 3.1               | 3.0               | 1.000                        | <0.001                          | <0.001                          |
| 1-(beta-D-ribofuranosyl)thymine                                                                        | 1.1            | 3.1               | 2.9               | 1.000                        | <0.001                          | <0.001                          |
| 1,4,5,6-Tetrahydro-2-methyl-4-pyrimidinecarboxylic acid                                                | 1.2            | 2.7               | 2.2               | 0.207                        | <0.001                          | <0.001                          |
| N-oleoyl tyrosine                                                                                      | 0.7            | 0.4               | 0.5               | 0.599                        | <0.001                          | 0.001                           |
| 15-(tert-Butyl)-2,3,5,6,8,9,11,12-octahydro-1,4,7,10,13-benzopentaoxacyclopentadecine                  | 0.6            | 1.6               | 2.6               | 0.440                        | 0.030                           | <0.001                          |
| 16 $\alpha$ -Hydroxydehydroepiandrosterone                                                             | 0.7            | 3.0               | 4.2               | 0.650                        | <0.001                          | <0.001                          |
| 19(R)-HETE                                                                                             | 1.2            | 2.9               | 2.4               | 1.000                        | <0.001                          | <0.001                          |
| 19-Nortestosterone                                                                                     | 1.0            | 2.5               | 2.4               | 1.000                        | <0.001                          | 0.009                           |
| 1-alpha,24R,25-Trihydroxyvitamin D2                                                                    | 0.8            | 0.4               | 0.4               | 0.385                        | <0.001                          | 0.003                           |
| 1-Naphthol                                                                                             | 1.1            | 2.3               | 2.1               | 0.493                        | <0.001                          | 0.009                           |
| 1-Pentofuranosyl-2,4(1H,3H)-pyrimidinedione                                                            | 1.0            | 2.5               | 2.5               | 1.000                        | <0.001                          | <0.001                          |
| 2-(2-[4-(4-Fluorophenyl)piperazino]-2-oxoethyl)sulfanyl)acetic acid                                    | 1.5            | 0.5               | 0.4               | 1.000                        | 0.006                           | <0.001                          |
| 2-(1H-Benzimidazol-2-ylsulfanyl)-N-(3-cyano-6-methyl-4,5,6,7-tetrahydro-1-benzothiophen-2-yl)acetamide | 1.0            | 5.8               | 5.8               | 0.458                        | <0.001                          | <0.001                          |
| 2-(Phenylsulfonyl)acetophenone                                                                         | 1.1            | 2.2               | 2.0               | 1.000                        | 0.001                           | 0.001                           |
| 2,6-quinolinediol                                                                                      | 1.3            | 3.9               | 3.0               | 0.410                        | <0.001                          | <0.001                          |
| 2-[2-(3,4-dimethoxyphenyl)ethyl]-4-methoxy-2,3-dihydropyran-6-one                                      | 0.9            | 2.0               | 2.1               | 1.000                        | <0.001                          | <0.001                          |
| 2-Aminoadenosine                                                                                       | 0.9            | 3.2               | 3.4               | 1.000                        | <0.001                          | <0.001                          |
| 2-Hydroxyhippuric acid                                                                                 | 1.4            | 3.4               | 2.4               | 0.422                        | <0.001                          | 0.040                           |
| 2-methoxyacetaminophen sulfate                                                                         | 0.9            | 2.1               | 2.4               | 0.979                        | <0.001                          | <0.001                          |

|                                                                                                                                                                           |     |     |      |       |        |        |
|---------------------------------------------------------------------------------------------------------------------------------------------------------------------------|-----|-----|------|-------|--------|--------|
| 2-methylbutyrylcarnitine                                                                                                                                                  | 1.1 | 0.5 | 0.5  | 1.000 | <0.001 | <0.001 |
| 3-(2-Hydroxy-5-methoxybenzoyl)-2-(4-methylphenyl)isoindolin-1-one                                                                                                         | 0.8 | 0.4 | 0.4  | 1.000 | <0.001 | <0.001 |
| 3,13,13,17-Tetramethyl-21-oxa-12-azahexacyclo[10.7.1.1~2,17~.0~5,20~.0~6,11~.0~14,19~]henicosane-1(20),2,4,6,8,10-hexaen-16-ol                                            | 0.9 | 0.4 | 0.5  | 0.798 | <0.001 | 0.001  |
| 3,4,5-trimethoxydihydrocinnamic acid                                                                                                                                      | 1.0 | 2.9 | 2.8  | 1.000 | 0.027  | 0.037  |
| 3',4'-Dimethoxyacetophenone                                                                                                                                               | 1.0 | 2.8 | 2.9  | 1.000 | 0.035  | 0.039  |
| 3-Hydroxy-cis-5-tetradecenoylcarnitine                                                                                                                                    | 0.9 | 2.1 | 2.2  | 1.000 | <0.001 | <0.001 |
| 4-methoxy-5-methyl-6-[(2S,3S)-2-methyl-3-[(2Z,4E)-4-methyl-5-[(1S,2S,4R,5R)-1,2,4-trimethyl-3,6-dioxabicyclo[3.1.0]hexan-4-yl]penta-2,4-dien-2-yl]oxiran-2-yl]pyran-2-one | 1.0 | 3.3 | 3.2  | 1.000 | <0.001 | <0.001 |
| Alpha-Farnesene                                                                                                                                                           | 1.2 | 0.5 | 0.4  | 1.000 | <0.001 | <0.001 |
| 5-(6-Hydroxy-2,5,7,8-tetramethyl-chroman-2-yl)-2-methyl-pentanoic acid                                                                                                    | 1.0 | 2.9 | 3.0  | 1.000 | <0.001 | <0.001 |
| 5-Butyl-1,3-oxazole                                                                                                                                                       | 1.5 | 3.3 | 2.2  | 0.101 | <0.001 | <0.001 |
| 5-guanidino-2-oxopentanoic acid                                                                                                                                           | 1.1 | 2.4 | 2.1  | 1.000 | <0.001 | <0.001 |
| 5-Indolol                                                                                                                                                                 | 1.2 | 3.7 | 3.2  | 0.472 | <0.001 | <0.001 |
| 5 $\alpha$ -Dihydrotestosterone                                                                                                                                           | 0.9 | 1.8 | 2.0  | 1.000 | 0.003  | <0.001 |
| 5 $\alpha$ -Tetrahydrocortisol                                                                                                                                            | 0.7 | 9.2 | 12.3 | 1.000 | <0.001 | <0.001 |
| 2,2'-[4-(2-Hydroxyethylamino)-3-nitrophenylimino]diethanol                                                                                                                | 1.0 | 4.6 | 4.4  | 1.000 | <0.001 | <0.001 |
| 6-Hydroxy-5-methyl-4,11-dioxoundecanoic acid                                                                                                                              | 1.1 | 2.9 | 2.6  | 1.000 | <0.001 | <0.001 |
| 6-Ketoprostaglandin F1 $\alpha$                                                                                                                                           | 0.7 | 1.7 | 2.3  | 0.923 | <0.001 | <0.001 |
| 6 $\beta$ -Hydroxyfluoymesterone                                                                                                                                          | 1.4 | 3.4 | 2.4  | 0.435 | <0.001 | <0.001 |
| [2-(Dimethoxymethyl)-1-heptenyl]benzene                                                                                                                                   | 0.9 | 2.4 | 2.8  | 1.000 | <0.001 | <0.001 |
| N-Nitrosodibutylamine                                                                                                                                                     | 0.9 | 2.2 | 2.4  | 1.000 | <0.001 | <0.001 |
| Noroxycodone                                                                                                                                                              | 0.5 | 0.1 | 0.2  | 1.000 | <0.001 | 0.001  |
| 9-O-Demethyl-2 $\alpha$ -hydroxyhomolycorine                                                                                                                              | 0.7 | 0.3 | 0.5  | 1.000 | 0.028  | 0.022  |
| Acamprosate                                                                                                                                                               | 1.1 | 2.5 | 2.3  | 1.000 | <0.001 | <0.001 |
| Acetyl-L-carnitine                                                                                                                                                        | 1.4 | 4.3 | 3.1  | 0.280 | <0.001 | <0.001 |
| Acetyllycopsamine                                                                                                                                                         | 1.2 | 3.0 | 2.5  | 1.000 | <0.001 | <0.001 |
| Actinonin                                                                                                                                                                 | 0.8 | 1.7 | 2.1  | 1.000 | 0.001  | 0.010  |
| Aderbasib                                                                                                                                                                 | 1.2 | 3.3 | 2.7  | 1.000 | <0.001 | <0.001 |
| Allixin                                                                                                                                                                   | 1.1 | 2.6 | 2.5  | 1.000 | <0.001 | <0.001 |
| Alloxydim                                                                                                                                                                 | 1.0 | 2.7 | 2.7  | 0.799 | <0.001 | <0.001 |
| Alminoprofen                                                                                                                                                              | 1.1 | 0.4 | 0.4  | 1.000 | <0.001 | <0.001 |
| Aloesin                                                                                                                                                                   | 1.0 | 2.1 | 2.2  | 1.000 | 0.002  | 0.001  |
| Alpha-(4-methoxyphenyl)-6-methyl-2-pyridineacrylic acid                                                                                                                   | 1.0 | 2.2 | 2.1  | 1.000 | <0.001 | <0.001 |

|                                  |     |      |      |       |        |        |
|----------------------------------|-----|------|------|-------|--------|--------|
| Alpha-Cehc                       | 1.0 | 2.0  | 2.0  | 1.000 | <0.001 | <0.001 |
| Amidapsone                       | 1.0 | 4.4  | 4.6  | 1.000 | <0.001 | <0.001 |
| Amygdalin                        | 0.8 | 1.6  | 2.0  | 1.000 | 0.024  | 0.019  |
| Andrographolide                  | 0.7 | 2.1  | 3.0  | 1.000 | <0.001 | <0.001 |
| Androsterone                     | 1.5 | 3.5  | 2.4  | 0.053 | <0.001 | <0.001 |
| Apiol                            | 1.0 | 2.9  | 2.8  | 1.000 | 0.027  | 0.037  |
| Arachidonic acid                 | 1.3 | 2.7  | 2.0  | 0.538 | <0.001 | <0.001 |
| Artemisinin                      | 1.1 | 2.4  | 2.2  | 0.659 | <0.001 | <0.001 |
| Atractylone                      | 1.2 | 3.5  | 2.9  | 0.642 | <0.001 | <0.001 |
| Benfluralin                      | 0.9 | 11.3 | 12.0 | 0.276 | <0.001 | <0.001 |
| Benznidazole                     | 0.6 | 2.5  | 3.9  | 1.000 | <0.001 | <0.001 |
| Betaine                          | 1.1 | 2.3  | 2.1  | 1.000 | <0.001 | <0.001 |
| Buflomedil                       | 1.3 | 3.3  | 2.6  | 0.654 | <0.001 | 0.005  |
| Butabarbital                     | 1.1 | 2.6  | 2.4  | 1.000 | <0.001 | 0.001  |
| Callystatin A                    | 0.9 | 0.4  | 0.4  | 1.000 | <0.001 | 0.021  |
| Candoxatril                      | 1.2 | 2.6  | 2.3  | 1.000 | 0.004  | 0.028  |
| Cannabidivarin                   | 1.0 | 2.1  | 2.1  | 1.000 | <0.001 | <0.001 |
| Carbaprostacyclin                | 1.4 | 3.4  | 2.4  | 0.075 | <0.001 | <0.001 |
| Carisoprodol                     | 1.3 | 3.4  | 2.6  | 0.658 | <0.001 | <0.001 |
| Carteolol                        | 1.0 | 3.1  | 3.2  | 1.000 | <0.001 | <0.001 |
| Cinnamoylglycine                 | 0.8 | 4.1  | 5.2  | 1.000 | <0.001 | <0.001 |
| Ciprostene                       | 0.9 | 0.4  | 0.4  | 1.000 | <0.001 | <0.001 |
| Clethodim sulfone                | 1.2 | 2.8  | 2.4  | 0.946 | <0.001 | <0.001 |
| Clonazolam                       | 1.0 | 2.5  | 2.6  | 1.000 | <0.001 | <0.001 |
| Codeine                          | 1.0 | 0.3  | 0.3  | 0.932 | <0.001 | 0.004  |
| Coenzyme Q2                      | 0.9 | 2.1  | 2.2  | 1.000 | <0.001 | <0.001 |
| Coronatine                       | 1.0 | 3.1  | 3.0  | 1.000 | <0.001 | <0.001 |
| Cyclooctatin                     | 1.9 | 4.8  | 2.5  | 0.182 | <0.001 | <0.001 |
| Glyol                            | 1.2 | 3.5  | 3.0  | 1.000 | <0.001 | <0.001 |
| Desonide                         | 0.5 | 3.4  | 7.2  | 1.000 | 0.001  | <0.001 |
| Dihydroberberine                 | 1.3 | 0.6  | 0.4  | 1.000 | 0.002  | 0.017  |
| Dihydrocodeine                   | 1.0 | 4.4  | 4.3  | 1.000 | <0.001 | <0.001 |
| DL-Glutamine                     | 1.3 | 7.7  | 5.9  | 0.500 | <0.001 | <0.001 |
| D-Maltose                        | 1.0 | 3.6  | 3.6  | 0.970 | <0.001 | <0.001 |
| Docosahexaenoic acid ethyl ester | 0.8 | 3.5  | 4.1  | 1.000 | <0.001 | <0.001 |
| Docosapentaenoic acid            | 1.2 | 0.6  | 0.5  | 1.000 | 0.008  | 0.015  |
| Doramectin                       | 1.1 | 5.0  | 4.8  | 1.000 | <0.001 | <0.001 |

|                                                           |     |      |     |       |        |        |
|-----------------------------------------------------------|-----|------|-----|-------|--------|--------|
| D- $\alpha$ -Tocopherol                                   | 1.0 | 0.5  | 0.5 | 1.000 | <0.001 | 0.003  |
| 7-Methylxanthine                                          | 0.9 | 1.9  | 2.1 | 1.000 | <0.001 | <0.001 |
| Epitestosterone glucuronide                               | 0.7 | 3.6  | 5.1 | 1.000 | <0.001 | <0.001 |
| Europine                                                  | 0.8 | 5.3  | 6.7 | 1.000 | <0.001 | <0.001 |
| Theasapogenol B                                           | 0.9 | 0.2  | 0.2 | 0.262 | <0.001 | <0.001 |
| Salinosporamide B                                         | 1.5 | 3.6  | 2.5 | 1.000 | <0.001 | <0.001 |
| Glycerol tripropionate                                    | 1.1 | 4.0  | 3.6 | 1.000 | <0.001 | <0.001 |
| Flossonol                                                 | 1.2 | 2.6  | 2.3 | 0.510 | <0.001 | <0.001 |
| Gamma-glutamyltyramine                                    | 1.1 | 3.0  | 2.9 | 1.000 | <0.001 | <0.001 |
| Genistin                                                  | 0.9 | 0.3  | 0.3 | 1.000 | <0.001 | 0.006  |
| Glaucarubinone                                            | 0.9 | 2.0  | 2.3 | 1.000 | <0.001 | <0.001 |
| Hexanoylcarnitine                                         | 1.3 | 2.8  | 2.2 | 1.000 | <0.001 | <0.001 |
| Hippuric acid                                             | 1.0 | 2.1  | 2.2 | 1.000 | <0.001 | 0.001  |
| Homocitrulline                                            | 0.9 | 2.3  | 2.5 | 0.807 | <0.001 | <0.001 |
| Hostmaniane                                               | 1.2 | 2.4  | 2.1 | 0.739 | <0.001 | <0.001 |
| Hydroxypropionylcarnitine                                 | 0.9 | 3.1  | 3.6 | 1.000 | <0.001 | <0.001 |
| Indane                                                    | 1.2 | 0.5  | 0.4 | 1.000 | 0.011  | 0.019  |
| Indol-2-one                                               | 0.8 | 3.8  | 4.9 | 1.000 | <0.001 | <0.001 |
| Indol-4-one                                               | 1.0 | 3.2  | 3.1 | 1.000 | <0.001 | <0.001 |
| Indolyl-3-acryloylglycine                                 | 1.2 | 2.8  | 2.3 | 1.000 | 0.026  | 0.006  |
| Iobitridol                                                | 0.8 | 6.2  | 7.5 | 1.000 | <0.001 | <0.001 |
| Kanamycin                                                 | 1.1 | 6.3  | 6.0 | 0.840 | <0.001 | <0.001 |
| L-Ergothioneine                                           | 1.4 | 0.7  | 0.5 | 0.726 | <0.001 | <0.001 |
| Leucine                                                   | 1.1 | 2.8  | 2.7 | 1.000 | <0.001 | <0.001 |
| Leucylproline                                             | 1.0 | 2.1  | 2.1 | 1.000 | <0.001 | <0.001 |
| L-Glutathione oxidized                                    | 1.0 | 2.5  | 2.3 | 1.000 | <0.001 | <0.001 |
| Lincomycin                                                | 1.2 | 3.1  | 2.6 | 0.784 | <0.001 | <0.001 |
| L-Kynurenine                                              | 1.0 | 2.1  | 2.0 | 1.000 | <0.001 | <0.001 |
| L-Pyroglutamic acid                                       | 1.5 | 3.7  | 2.4 | 0.292 | <0.001 | <0.001 |
| L-Tyrosine                                                | 1.0 | 2.0  | 2.1 | 1.000 | <0.001 | <0.001 |
| Magnolol                                                  | 0.7 | 1.8  | 2.5 | 1.000 | 0.001  | <0.001 |
| Mephenytoin                                               | 1.5 | 5.4  | 3.7 | 0.351 | <0.001 | <0.001 |
| Metharbital                                               | 1.3 | 3.5  | 2.8 | 0.440 | <0.001 | <0.001 |
| Methasterone                                              | 0.9 | 1.7  | 2.0 | 1.000 | <0.001 | <0.001 |
| Methionine                                                | 1.8 | 12.5 | 6.9 | 0.213 | <0.001 | <0.001 |
| Methyl (3-hydroxy-2-oxo-2,3-dihydro-1H-indol-3-yl)acetate | 0.6 | 3.1  | 5.0 | 1.000 | 0.012  | 0.002  |



|                                                          |     |      |     |       |        |        |
|----------------------------------------------------------|-----|------|-----|-------|--------|--------|
| Methyl indole-3-acetate                                  | 1.1 | 3.5  | 3.3 | 1.000 | <0.001 | <0.001 |
| Milbemycin A4 oxime                                      | 0.9 | 1.9  | 2.0 | 1.000 | <0.001 | <0.001 |
| Miltirone                                                | 0.5 | 3.4  | 6.9 | 1.000 | <0.001 | <0.001 |
| Morphinone                                               | 0.7 | 0.2  | 0.2 | 1.000 | <0.001 | 0.001  |
| Myriocin                                                 | 0.8 | 1.6  | 2.1 | 1.000 | <0.001 | <0.001 |
| N-(4-coumaroyl)-L-homoserine lactone                     | 1.5 | 8.3  | 5.5 | 0.526 | <0.001 | <0.001 |
| N-(indol-3-ylacetyl)glutamine                            | 1.5 | 5.4  | 3.5 | 0.944 | <0.001 | <0.001 |
| N-(indole-3-acetyl)glutamic acid                         | 1.0 | 2.3  | 2.2 | 1.000 | <0.001 | <0.001 |
| N-[(9-beta-D-ribofuranosylpurin-6-yl)carbamoyl]threonine | 0.9 | 2.6  | 2.8 | 1.000 | <0.001 | <0.001 |
| N1-(2-Pyridylmethyl)-4-methylbenzene-1-sulfonamide       | 1.4 | 3.2  | 2.3 | 0.453 | <0.001 | <0.001 |
| N4-Acetyl sulfamethazine                                 | 0.7 | 5.5  | 7.8 | 1.000 | <0.001 | <0.001 |
| N-Acetylhistamine                                        | 0.8 | 2.6  | 3.3 | 1.000 | 0.011  | 0.005  |
| N-Acetylvaline                                           | 1.1 | 2.4  | 2.1 | 1.000 | <0.001 | <0.001 |
| Nalorphine                                               | 0.7 | 0.2  | 0.2 | 0.519 | <0.001 | 0.002  |
| N-Butyl salicylate                                       | 1.2 | 2.3  | 2.0 | 0.619 | <0.001 | 0.002  |
| N-Caffeoylputrescine                                     | 1.1 | 3.9  | 3.6 | 1.000 | <0.001 | <0.001 |
| N-Phenylacetylglutamic acid                              | 0.8 | 2.0  | 2.5 | 1.000 | <0.001 | <0.001 |
| N-Phenylacetylglutamine                                  | 1.4 | 8.0  | 5.8 | 0.391 | <0.001 | <0.001 |
| O-3-methylglutaryl carnitine                             | 1.2 | 3.1  | 2.6 | 0.480 | <0.001 | <0.001 |
| Oleyl anilide                                            | 1.0 | 2.3  | 2.3 | 1.000 | <0.001 | <0.001 |
| Ophthalmic acid                                          | 1.1 | 2.7  | 2.5 | 0.863 | <0.001 | <0.001 |
| Ornithinoalanine                                         | 1.4 | 4.0  | 2.8 | 0.496 | <0.001 | <0.001 |
| Palmitoylcarnitine                                       | 0.8 | 0.1  | 0.1 | 1.000 | 0.001  | 0.008  |
| Pantoprazole                                             | 1.0 | 2.0  | 2.0 | 0.460 | <0.001 | 0.003  |
| Phenisopham                                              | 1.3 | 10.2 | 7.8 | 0.889 | <0.001 | <0.001 |
| Piperanine                                               | 1.2 | 0.4  | 0.3 | 1.000 | 0.007  | 0.003  |
| Piperine                                                 | 0.7 | 0.2  | 0.2 | 1.000 | <0.001 | 0.001  |
| Prednisone                                               | 0.9 | 2.2  | 2.5 | 1.000 | <0.001 | <0.001 |
| Pregnanetriol                                            | 0.9 | 2.1  | 2.3 | 1.000 | <0.001 | <0.001 |
| Pregnenolone                                             | 0.9 | 1.9  | 2.0 | 1.000 | 0.001  | 0.001  |
| Proacaciberin                                            | 1.0 | 2.3  | 2.3 | 1.000 | <0.001 | <0.001 |
| Probenazole                                              | 0.9 | 2.3  | 2.5 | 1.000 | <0.001 | <0.001 |
| Progesterone                                             | 1.3 | 3.0  | 2.2 | 0.169 | <0.001 | <0.001 |
| Promolate                                                | 1.0 | 3.0  | 2.9 | 1.000 | <0.001 | <0.001 |
| Propionylcarnitine                                       | 1.0 | 2.0  | 2.0 | 1.000 | <0.001 | <0.001 |
| Pulcherrimic acid                                        | 0.9 | 2.6  | 2.7 | 1.000 | <0.001 | <0.001 |

|                                  |     |     |     |       |        |        |
|----------------------------------|-----|-----|-----|-------|--------|--------|
| Pumiliotoxin 251D                | 0.7 | 1.5 | 2.3 | 0.325 | 0.001  | <0.001 |
| Ricinoleic Acid                  | 0.8 | 0.4 | 0.5 | 0.511 | <0.001 | 0.002  |
| Roxatidine                       | 1.1 | 8.1 | 7.4 | 1.000 | <0.001 | <0.001 |
| Ryania                           | 0.5 | 3.5 | 7.3 | 1.000 | <0.001 | <0.001 |
| Salinomycin                      | 0.6 | 1.5 | 2.4 | 0.539 | 0.013  | <0.001 |
| Secobarbital                     | 1.0 | 2.1 | 2.2 | 1.000 | <0.001 | <0.001 |
| Sesamin                          | 1.2 | 9.4 | 7.9 | 0.513 | <0.001 | <0.001 |
| Siaresinol                       | 1.0 | 0.2 | 0.2 | 0.265 | <0.001 | <0.001 |
| Soyasaponin I                    | 1.4 | 3.5 | 2.4 | 0.599 | <0.001 | <0.001 |
| Stylisterol B                    | 0.8 | 0.2 | 0.3 | 0.314 | <0.001 | 0.001  |
| Sucrose acetate isobutyrate      | 1.0 | 2.7 | 2.7 | 1.000 | <0.001 | <0.001 |
| Telmisartan                      | 0.8 | 3.2 | 3.9 | 0.188 | <0.001 | 0.027  |
| Tetrahydrocortisone              | 1.0 | 3.1 | 3.2 | 1.000 | <0.001 | <0.001 |
| Tetranor 12-HETE                 | 0.7 | 1.5 | 2.0 | 0.811 | 0.004  | <0.001 |
| thr-tyr                          | 1.2 | 3.6 | 2.9 | 0.998 | <0.001 | <0.001 |
| 2-Tetrahydrothiopheneacetic acid | 1.2 | 2.6 | 2.2 | 0.985 | <0.001 | <0.001 |
| N-Acetyl-L-tryptophan            | 1.0 | 2.7 | 2.6 | 1.000 | 0.007  | 0.001  |
| Lophophorine                     | 1.2 | 2.7 | 2.2 | 0.979 | <0.001 | <0.001 |
| N-Acetylthreonine                | 1.0 | 2.6 | 2.5 | 1.000 | <0.001 | <0.001 |
| Valyltyrosine                    | 1.1 | 2.3 | 2.2 | 1.000 | <0.001 | <0.001 |
| Valylvaline                      | 1.5 | 3.7 | 2.5 | 1.000 | <0.001 | <0.001 |
| Veliflapon                       | 0.8 | 0.3 | 0.3 | 0.617 | <0.001 | <0.001 |
| Zalcitabine                      | 0.8 | 2.2 | 2.6 | 1.000 | <0.001 | <0.001 |
| Zopiclone                        | 1.1 | 7.9 | 7.4 | 0.918 | <0.001 | <0.001 |
| $\alpha$ -Hydroxyhippuric acid   | 0.9 | 6.0 | 6.7 | 1.000 | <0.001 | <0.001 |
| $\alpha$ -Zearalanol             | 1.0 | 5.1 | 5.0 | 0.094 | <0.001 | 0.012  |
| $\beta$ -Cortolone               | 1.0 | 2.3 | 2.3 | 1.000 | <0.001 | <0.001 |

**Supplementary Table 4.** Spearman’s correlation between renal function, expressed as estimated Glomerular Filtration Rate (eGFR), and the 20 metabolites with least FDR adjusted *p*-value in difference in abundance between T2D and T2D-DN. (NGT: normal glucose tolerance, T2D: type 2 diabetes mellitus, T2D-DN: type 2 diabetes mellitus-diabetic nephropathy)

| Metabolite                                               | eGFR (mL/min/1.73m <sup>2</sup> ) |                 |            |                 |            |                 |
|----------------------------------------------------------|-----------------------------------|-----------------|------------|-----------------|------------|-----------------|
|                                                          | NGT                               |                 | T2D        |                 | T2D-DN     |                 |
|                                                          | <i>rho</i>                        | <i>p</i> -value | <i>rho</i> | <i>p</i> -value | <i>rho</i> | <i>p</i> -value |
| Imidazolelactate                                         | -0.20                             | 0.286           | -0.42      | 0.025           | -0.62      | <0.001          |
| L-Pyroglutamic acid                                      | -0.30                             | 0.107           | -0.29      | 0.129           | -0.60      | <0.001          |
| Mephénytoin                                              | -0.26                             | 0.163           | -0.14      | 0.474           | -0.66      | <0.001          |
| N-Phenylacetylglutamine                                  | -0.31                             | 0.094           | -0.29      | 0.131           | -0.61      | <0.001          |
| N-Phenylacetylglutamic acid                              | -0.33                             | 0.080           | -0.39      | 0.037           | -0.64      | <0.001          |
| 2,6-quinolinediol                                        | 0.11                              | 0.575           | -0.55      | 0.002           | -0.70      | <0.001          |
| DL-Glutamine                                             | -0.30                             | 0.106           | -0.26      | 0.167           | -0.60      | <0.001          |
| Ornithinoalanine                                         | -0.33                             | 0.079           | -0.24      | 0.207           | -0.65      | <0.001          |
| Secobarbital                                             | -0.41                             | 0.027           | -0.21      | 0.267           | -0.71      | <0.001          |
| α-Hydroxyhippuric acid                                   | 0.15                              | 0.444           | -0.13      | 0.505           | -0.63      | <0.001          |
| N-Acetylthreonine                                        | -0.11                             | 0.571           | 0.11       | 0.567           | -0.53      | 0.002           |
| N-Caffeoylputrescine                                     | -0.05                             | 0.783           | -0.10      | 0.599           | -0.74      | <0.001          |
| N-[(9-beta-D-ribofuranosylpurin-6-yl)carbamoyl]threonine | -0.42                             | 0.022           | -0.38      | 0.042           | -0.79      | <0.001          |
| Indol-4-one                                              | -0.26                             | 0.158           | -0.08      | 0.677           | -0.59      | <0.001          |
| Glycerol tripropionate                                   | -0.23                             | 0.223           | -0.20      | 0.298           | -0.59      | <0.001          |
| EUROPINE                                                 | -0.12                             | 0.528           | -0.18      | 0.355           | -0.72      | <0.001          |
| Aderbasib                                                | -0.21                             | 0.259           | -0.19      | 0.321           | -0.59      | 0.001           |
| [2-(Dimethoxymethyl)-1-heptenyl]benzene                  | -0.03                             | 0.884           | -0.50      | 0.006           | -0.60      | <0.001          |
| 1-(beta-D-ribofuranosyl)thymine                          | 0.24                              | 0.208           | -0.43      | 0.019           | -0.69      | <0.001          |
| 2-methoxyacetaminophen sulfate                           | -0.40                             | 0.032           | 0.00       | 0.994           | -0.68      | <0.001          |

**Supplementary Table 5.** The 3 metabolites specifically associated with T2D [significantly dysregulated between NGT and T2D as well as between T2D and T2D-DN (FDR adjusted *p*-value < 0.05) but not between NGT and T2D-DN. (NGT: normal glucose tolerance, T2D: type 2 diabetes mellitus, T2D-DN: type 2 diabetes mellitus-diabetic nephropathy)

| <b>Metabolite</b>                                                             | <b>Ratio T2D/N GT</b> | <b>Ratio T2D-DN/N GT</b> | <b>Ratio T2D-DN/T 2D</b> | <b>Adjusted <i>p</i>-value T2D/N GT</b> | <b>Adjusted <i>p</i>-value T2D-DN/N GT</b> | <b>Adjusted <i>p</i>-value T2D-DN/T 2D</b> |
|-------------------------------------------------------------------------------|-----------------------|--------------------------|--------------------------|-----------------------------------------|--------------------------------------------|--------------------------------------------|
| 1-arachidonoyl-sn-glycero-3-phosphocholine                                    | 1.5                   | 1.0                      | 0.6                      | 0.015                                   | 0.859                                      | 0.035                                      |
| 4-(8-Methyl-8,9-dihydro-7H-[1,3]dioxolo[4,5-h][2,3]benzodiazepin-5-yl)aniline | 1.4                   | 0.9                      | 0.7                      | 0.044                                   | 1.000                                      | 0.004                                      |
| Phenylalanylproline                                                           | 0.7                   | 1.1                      | 1.6                      | 0.009                                   | 1.000                                      | <0.001                                     |

**Supplementary Figure 1.** Box plots depicting levels of (a) imidazolelactate, (b) cholecalciferol (c) 1-Stearyl glycerol, (d) palmitoylcarnitine, (e) choline, (f) 1-arachidonoyl-sn-glycero-3-phosphocholine, (g) phenylalanylproline and (h) 4-(8-Methyl-8,9-dihydro-7H-[1,3]dioxolo[4,5-h][2,3]benzodiazepin-5-yl)aniline in normal glucose tolerance (dark blue), type 2 diabetes mellitus (orange) and type 2 diabetes mellitus-diabetic nephropathy (light blue) subjects.

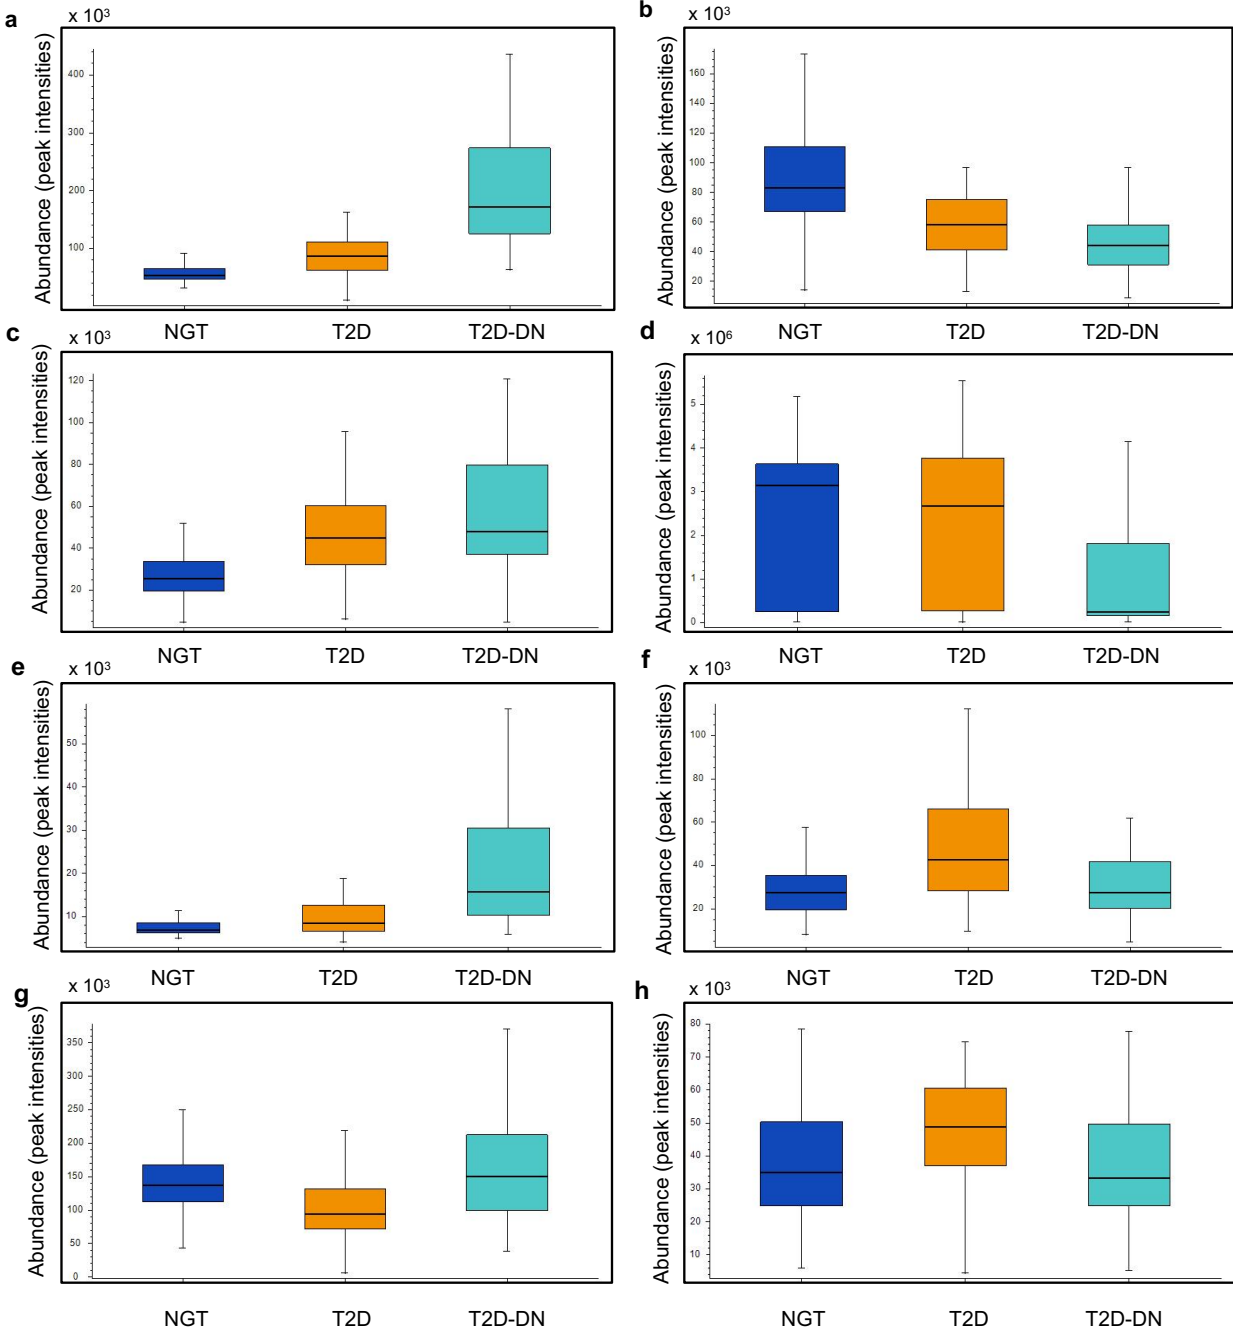

**Supplementary Figure 2.** Biochemical pathway and chemical relationships network of the 192 metabolites specifically associated with T2D-DN [significantly dysregulated between NGT and T2D-DN as well as between T2D and T2D-DN (FDR adjusted  $P$  value  $< 0.05$ ; and exhibiting a difference in ratio of  $\geq 2$  or  $\leq 0.5$  between the T2D-DN and T2D groups) but not between NGT and T2D]. Blue represents downregulated and red represents upregulated metabolites in T2D-DN compared to T2D and to NGT. (NGT: normal glucose tolerance, T2D: type 2 diabetes mellitus, T2D-DN: type 2 diabetes mellitus-diabetic nephropathy)

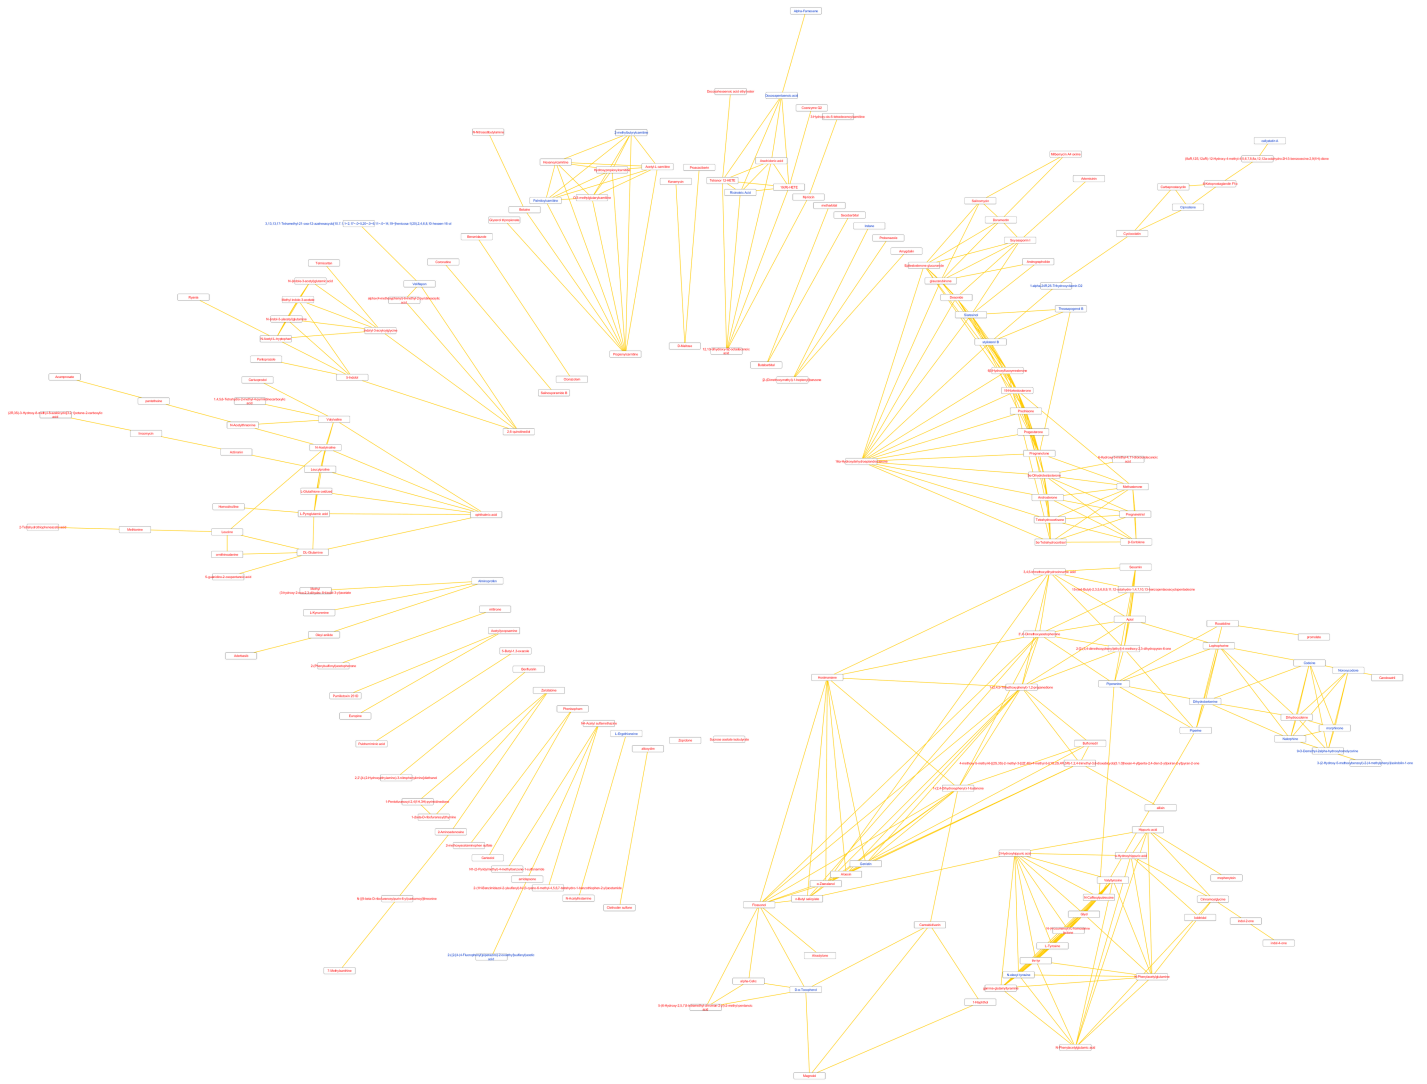

Supplement: 41598_2019_54584_MOESM1_ESM.pdf [file 41598_2019_54584_MOESM1_ESM.pdf]
